# Supplementary material for: Embryonic Deletion of TXNIP in GABAergic Neurons Enhanced Oxidative Stress in PV+ Interneurons in Primary Somatosensory Cortex of Aging Mice: Relevance to Schizophrenia
Source: MDPI journal article supplement (doi:10.3390/brainsci12101395), 2022-10-15
Supplement: s1 [file s1]

**Table S1. Demographical and clinical characteristics of the schizophrenia and healthy control group.**

| Variable                      | Group      |        |          |       | Analysis         |    |           |
|-------------------------------|------------|--------|----------|-------|------------------|----|-----------|
|                               | FEDN (126) |        | HC (478) |       | Statistic        | df | P         |
|                               | N          | %      | N        | %     |                  |    |           |
| <b>Sex</b>                    |            |        |          |       | $\chi^2 = 59.36$ | 1  | < 0.0001  |
| Male                          | 85         | 67.2%  | 146      | 30.5% |                  |    |           |
| Female                        | 41         | 32.8%  | 332      | 69.5% |                  |    |           |
|                               | Mean       | SD     | Mean     | SD    |                  |    |           |
| <b>Age (y)</b>                | 34.51      | 13.38  | 37.87    | 13.31 | F = 6.56         | 1  | P = 0.011 |
| <b>Onset age (y)</b>          | 30.22      | 1.54   |          |       |                  |    |           |
| <b>BMI (kg/m<sup>2</sup>)</b> | 21.50      | 3.18   | 22.14    | 2.96  | F = 4.74         | 1  | P = 0.030 |
| <b>CPZ dose (mg/d)</b>        | 450.45     | 286.24 |          |       |                  |    |           |
| <b>PANSS total score</b>      | 87.37      | 32.25  |          |       |                  |    |           |
| P subscore                    | 22.77      | 10.85  |          |       |                  |    |           |
| N subscore                    | 18.88      | 9.13   |          |       |                  |    |           |
| G subscore                    | 45.72      | 17.56  |          |       |                  |    |           |

Note:

BMI: Body Mass Index; CPZ, Chlorpromazine; PANSS, Positive and Negative Syndrome Scale; P, positive symptom; N, negative symptom; G, General psychopathology. FEDN: first-episode drug-naïve schizophrenia patients; HC: healthy controls
