# Supplementary material for: Embryonic Deletion of TXNIP in GABAergic Neurons Enhanced Oxidative Stress in PV+ Interneurons in Primary Somatosensory Cortex of Aging Mice: Relevance to Schizophrenia
Source: MDPI journal article supplement (doi:10.3390/brainsci12101395), 2022-10-15
Supplement: s1 [file s1]

**Table S3 Demographical and clinical characteristics of the schizophrenia subgroups and healthy control group.**

| Variable                                | Group                                 |        |          |       | Analysis         |    |           |
|-----------------------------------------|---------------------------------------|--------|----------|-------|------------------|----|-----------|
|                                         | FEDN ( $\leq 1.76\text{ng/mL}$ ) (34) |        | HC (478) |       | Statistic        | df | P         |
|                                         | N                                     | %      | N        | %     |                  |    |           |
| <b>Sex</b>                              |                                       |        |          |       | $\chi^2 = 38.60$ | 1  | P < 0.001 |
| Male                                    | 28                                    | 82.4%  | 146      | 30.5% |                  |    |           |
| Female                                  | 6                                     | 17.6%  | 332      | 69.5% |                  |    |           |
|                                         | Mean                                  | SD     | Mean     | SD    |                  |    |           |
| <b>Age (y)</b>                          | 35.97                                 | 13.15  | 37.87    | 13.31 | F = 0.656        | 1  | P = 0.418 |
| <b>Onset age (y)</b>                    | 27.67                                 | 5.00   |          |       |                  |    |           |
| <b>BMI (<math>\text{kg/m}^2</math>)</b> | 21.24                                 | 3.17   | 22.14    | 2.96  | F = 2.890        | 1  | P = 0.090 |
| <b>CPZ dose (mg/d)</b>                  | 525.76                                | 359.31 |          |       |                  |    |           |
| <b>PANSS total score</b>                | 75.03                                 | 23.80  |          |       |                  |    |           |
| P subscore                              | 16.00                                 | 3.33   |          |       |                  |    |           |
| N subscore                              | 18.48                                 | 7.93   |          |       |                  |    |           |
| G subscore                              | 40.54                                 | 15.32  |          |       |                  |    |           |

Note:

BMI: Body Mass Index; CPZ, Chlorpromazine; PANSS, Positive and Negative Syndrome Scale; P, positive symptom; N, negative symptom; G, General psychopathology. FEDN: first-episode drug-naïve schizophrenia patients; HC: healthy controls
