# Supplementary material for: Embryonic Deletion of TXNIP in GABAergic Neurons Enhanced Oxidative Stress in PV+ Interneurons in Primary Somatosensory Cortex of Aging Mice: Relevance to Schizophrenia
Source: MDPI journal article supplement (doi:10.3390/brainsci12101395), 2022-10-15
Supplement: s1 [file s1]

**Table S2 Demographical and clinical characteristics of the schizophrenia subgroups and healthy control group.**

| Variable                                | Group                                 |        |          |       | Analysis         |    |            |
|-----------------------------------------|---------------------------------------|--------|----------|-------|------------------|----|------------|
|                                         | FEDN ( $\geq 1.76\text{ng/mL}$ ) (92) |        | HC (478) |       | Statistic        | df | P          |
|                                         | N                                     | %      | N        | %     |                  |    |            |
| <b>Sex</b>                              |                                       |        |          |       | $\chi^2 = 37.84$ | 1  | P < 0.0001 |
| Male                                    | 58                                    | 63%    | 146      | 30.5% |                  |    |            |
| Female                                  | 34                                    | 37%    | 332      | 69.5% |                  |    |            |
|                                         | Mean                                  | SD     | Mean     | SD    |                  |    |            |
| <b>Age (y)</b>                          | 33.85                                 | 13.43  | 37.87    | 13.31 | F = 4.758        | 1  | P = 0.030  |
| <b>Onset age (y)</b>                    | 30.17                                 | 13.40  |          |       |                  |    |            |
| <b>BMI (<math>\text{kg/m}^2</math>)</b> | 21.61                                 | 3.20   | 22.14    | 2.96  | F = 1.936        | 1  | P = 0.165  |
| <b>CPZ dose (mg/d)</b>                  | 421.60                                | 252.14 |          |       |                  |    |            |
| <b>PANSS total score</b>                | 90.91                                 | 32.56  |          |       |                  |    |            |
| P subscore                              | 24.43                                 | 11.33  |          |       |                  |    |            |
| N subscore                              | 18.99                                 | 9.52   |          |       |                  |    |            |
| G subscore                              | 47.49                                 | 17.94  |          |       |                  |    |            |

Note:

BMI: Body Mass Index; CPZ, Chlorpromazine; PANSS, Positive and Negative Syndrome Scale; P, positive symptom; N, negative symptom; G, General psychopathology. FEDN: first-episode drug-naïve schizophrenia patients; HC: healthy controls
