# Supplementary material for: Embryonic Deletion of TXNIP in GABAergic Neurons Enhanced Oxidative Stress in PV+ Interneurons in Primary Somatosensory Cortex of Aging Mice: Relevance to Schizophrenia
Source: MDPI journal article supplement (doi:10.3390/brainsci12101395), 2022-10-15
Supplement: s1 [file s1]

**Table S4 Demographical and clinical characteristics of the schizophrenia subgroups.**

| Variable                      | Group                                         |        |                            |        | Analysis         |    |            |
|-------------------------------|-----------------------------------------------|--------|----------------------------|--------|------------------|----|------------|
|                               | Group1 ( $\geq 1.76$ ng/mL) (92) <sup>a</sup> |        | Group2 (< 1.76 ng/mL) (34) |        | Statistic        | df | P          |
|                               | N                                             | %      | N                          | %      |                  |    |            |
| <b>Sex</b>                    |                                               |        |                            |        | $\chi^2 = 4.272$ | 1  | P = 0.039  |
| Male                          | 58                                            | 63%    | 28                         | 82.4%  |                  |    |            |
| Female                        | 34                                            | 37%    | 6                          | 17.6%  |                  |    |            |
|                               | Mean                                          | SD     | Mean                       | SD     |                  |    |            |
| <b>Age (y)</b>                | 33.85                                         | 13.43  | 35.97                      | 13.15  | F = 0.621        | 1  | P = 0.432  |
| <b>Onset age (y)</b>          | 30.17                                         | 13.40  | 27.67                      | 5.00   | F = 0.20         | 1  | P = 0.652  |
| <b>BMI (kg/m<sup>2</sup>)</b> | 21.61                                         | 3.20   | 21.24                      | 3.17   | F = 0.31         | 1  | P = 0.579  |
| <b>CPZ dose (mg/d)</b>        | 421.60                                        | 252.14 | 525.76                     | 359.31 | F = 3.245        | 1  | P = 0.074  |
| <b>PANSS total score</b>      | 90.91                                         | 32.56  | 75.03                      | 23.80  | F = 6.52         | 1  | P = 0.012  |
| P subscore                    | 24.43                                         | 11.33  | 16.00                      | 3.33   | F = 11.35        | 1  | P < 0.0001 |
| N subscore                    | 18.99                                         | 9.52   | 18.48                      | 7.93   | F = 0.068        | 1  | P = 0.794  |
| G subscore                    | 47.49                                         | 17.94  | 40.54                      | 15.32  | F = 3.915        | 1  | P = 0.050  |

Note:

<sup>a</sup> FEND patients were divided to two subgroups based on their TXNIP concentration in plasma.

BMI: Body Mass Index; CPZ, Chlorpromazine; PANSS, Positive and Negative Syndrome Scale; P, positive symptom; N, negative symptom; G, General psychopathology. FEDN: first-episode drug-naïve schizophrenia patients; HC: healthy controls
